# Supplementary material
Source: publisher figshare collection journal article supplement (https://acs.figshare.com/ndownloader/files/3608937)
Supplement: Supplementary file 1 [file 3608937]

## SUPPORTING INFORMATION

### Effect of Alkyl Length of Peptide-Polymer Amphiphile on Cargo Encapsulation Stability and Pharmacokinetics of 3-Helix Micelles

**Nikhil Dube<sup>a#</sup>, Jai W. Seo<sup>b#</sup>, He Dong<sup>a</sup>, Jessica Y. Shu<sup>a</sup>, Reidar Lund<sup>a</sup>, Lisa M. Mahakian<sup>b</sup>, Katherine W. Ferrara<sup>b</sup>, Ting Xu<sup>a,c,d,\*</sup>**

<sup>a</sup> Department of Materials Science & Engineering, University of California, Berkeley, California 94720, United States

<sup>b</sup> Department of Biomedical Engineering, University of California, Davis, California 95616, United States

<sup>c</sup> Department of Chemistry, University of California, Berkeley, California 94720, United States

<sup>d</sup> Materials Science Division, Lawrence Berkeley National Laboratory, Berkeley, California 94720, United States

# indicates equal contribution

**\*Corresponding Author**

Email: [tingxu@berkeley.edu](mailto:tingxu@berkeley.edu)

Phone: 510-642-1632

Fax: 510-643-5792

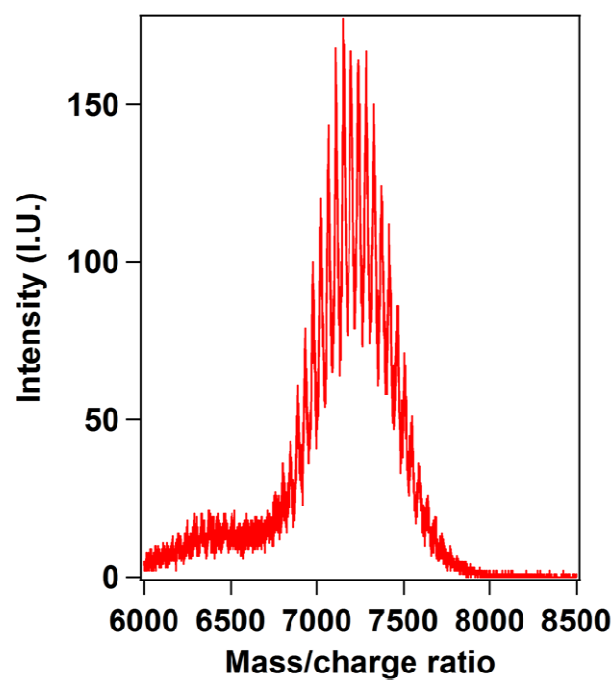

**Figure SI1.** MALDI-TOF spectrum of 1coi-dC16-P2K-P750, showing average molecular weight of 7150 Da. The distance between neighboring peaks is 44 Da, corresponding to the mass of a PEG repeat unit.

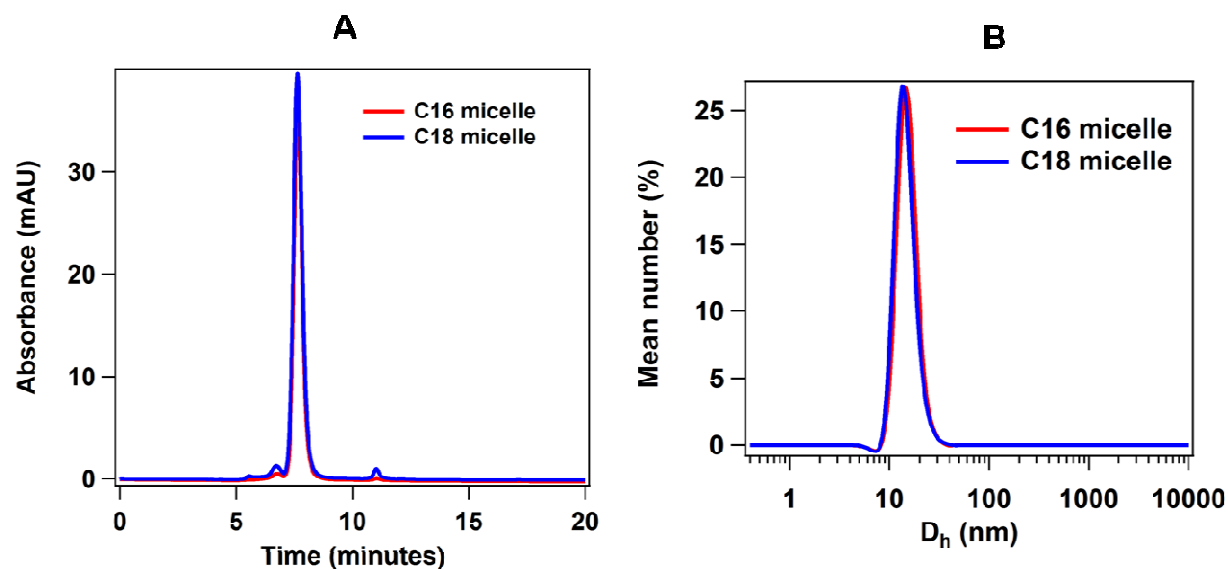

**Figure S12.** (A). SEC chromatograms of C16 and C18-micelles (1 mg/ml, injection volume 30  $\mu$ l), in phosphate buffer (25mM, pH 7.4). Elution is monitored at 220 nm. Both micelles show relative homogeneous distribution with minimal aggregation. (B). DLS measurement for hydrodynamic diameter of C16 and C18-micelles in phosphate buffer (25mM, pH 7.4) showing a size of  $\sim$  15 nm.

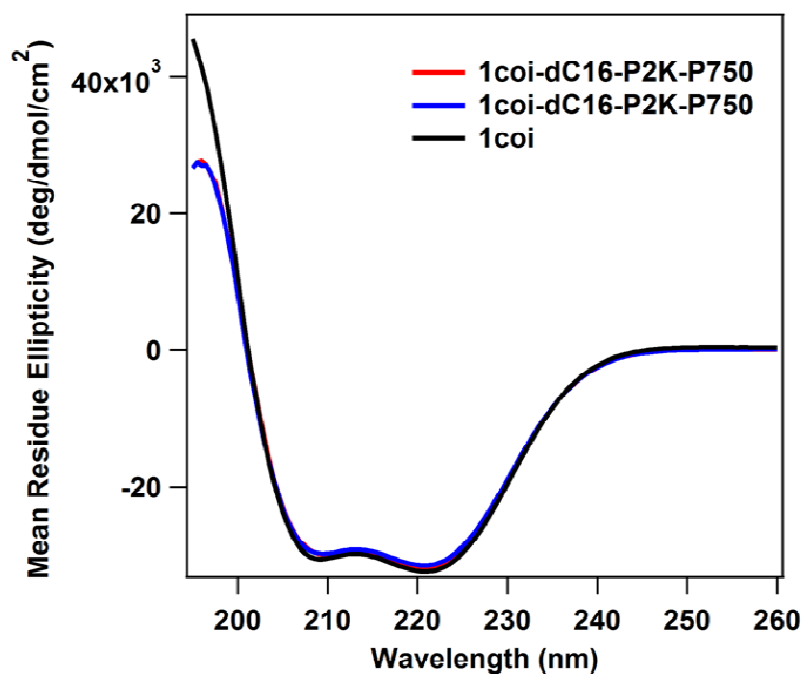

**Figure SI3.** CD spectrum of 1coi-dC16-P2K-P750 and 1coi-dC18-P2K-P750 micelles (peptide concentration, 200  $\mu$ M) in phosphate buffer (25mM, pH 7.4).  $\alpha$ -helical conformation is maintained, with helicity  $\sim 82\%$  for both conjugates, at a level similar to 1coi alone. The ratio between the ellipticity for both conjugates at 208 and 222 nm is  $\sim 1.04$ , indicating that coiled-coil tertiary structure of the peptide is maintained after conjugation of hydrophobic alkyl chains.

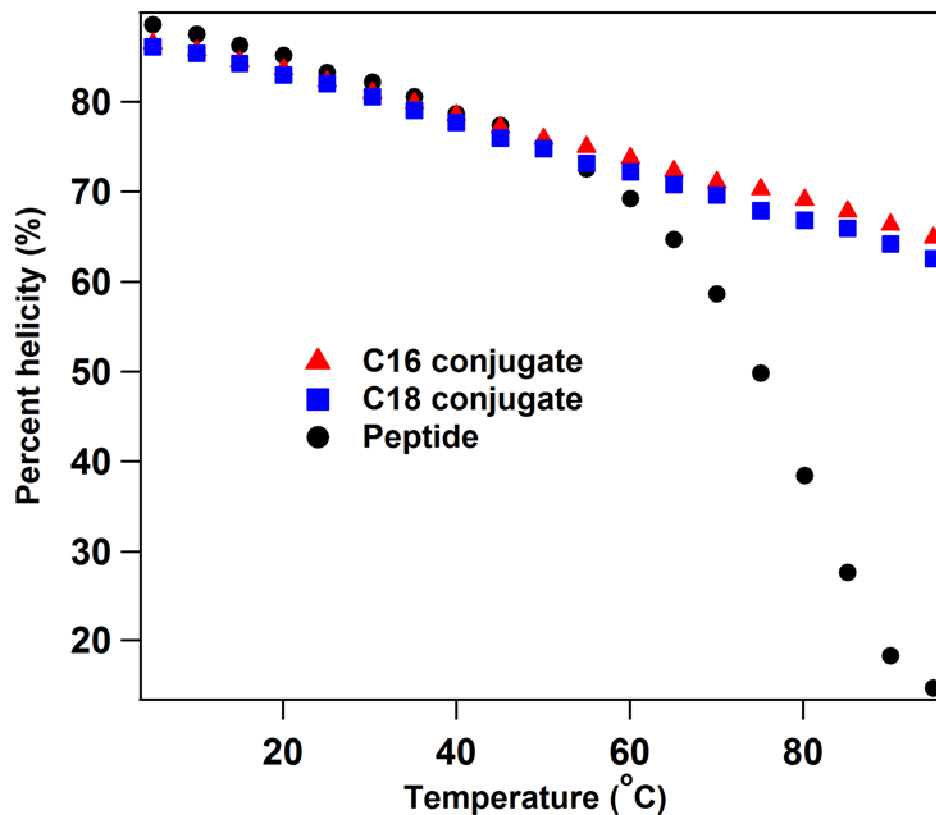

**Figure SI4.** Peptide helicity as function of temperature for 1coi, 1coi-dC16-P2K-P750, and 1coi-dC18-P2K-P750 (peptide concentration of 200  $\mu$ M), in phosphate buffer (25mM, pH 7.4). The melting curves indicate that peptide structure is significantly stabilized after conjugation with alkyl tails.
